# Supplementary material for: Selection criteria for electrical double layer structure regulators enabling stable Zn metal anodes
Source: Royal Society of Chemistry journal article supplement (doi:10.1039/d3ee00045a), 2023-01-01
Supplement: d3ee00045a1.pdf [file d3ee00045a1.pdf]

## Supporting Information

### **Selection Criteria for Electrical Double Layer Structure Regulators enabling Stable Zn Metal Anodes**

Cong Huang<sup>a</sup>, Xin Zhao<sup>b</sup>, Yisu Hao<sup>a</sup>, Yujie Yang<sup>a</sup>, Yang Qian<sup>a</sup>, Ge Chang<sup>a</sup>, Yan Zhang<sup>a</sup>, Qunli Tang<sup>a\*</sup>, Aiping Hu<sup>a</sup>, and Xiaohua Chen<sup>a\*</sup>

<sup>a</sup>College of Materials Science and Engineering, Hunan Province Key Laboratory for Advanced Carbon Materials and Applied Technology, Hunan University, Changsha 410082, P. R. China

E-mail: [xiaohuachen@hnu.edu.cn](mailto:xiaohuachen@hnu.edu.cn); [tangqunli@hnu.edu.cn](mailto:tangqunli@hnu.edu.cn)

<sup>b</sup>Tsinghua Shenzhen International Graduate School, Tsinghua University, Shenzhen, 518055, P. R. China

## 1. Experimental Section

*Materials:*  $\text{ZnSO}_4 \cdot 7\text{H}_2\text{O}$  (AR),  $\text{Na}_2\text{SO}_4$  (anhydrous, AR), methanol (anhydrous, AR), ethanol (anhydrous, AR), 2-propanol (AR), dimethyl sulfoxide (AR), acetone (AR), N-methylpyrrolidone (AR), N,N-dimethylformamide (AR), 1,3-dioxolane (AR), and ethylene glycol (AR) were purchased from Sinopharm. Dimethyl carbonate (99%), glycerol (99%), 1,2-dimethoxyethane (99.5%), bis(2-methoxy ethyl)ether (99.5%), ethylene carbonate (>99%), propylene carbonate (99%), and  $\text{Zn}(\text{CH}_3\text{COO})_2 \cdot 2\text{H}_2\text{O}$  (AR) were purchased from Macklin. Sulfolane (>99%) was purchased from Aladdin.

*Electrolyte preparation:* 2M  $\text{ZnSO}_4$  electrolyte was prepared by dissolving Zn salts ( $\text{ZnSO}_4 \cdot 7\text{H}_2\text{O}$ ) in deionized water. The control electrolytes were prepared by adding solvents with different volume ratios (0.1 vol%, 0.5 vol%, and 1 vol%) into 80 mL 2M  $\text{ZnSO}_4$  electrolyte. For sulfolane solvent, 100, 400, and 800  $\mu\text{L}$  sulfolane were added into 80 mL 2M  $\text{ZnSO}_4$  electrolyte, respectively. The optimization concentration for sulfolane was 0.5 vol%, and the corresponding electrolyte was denoted as Sul/ $\text{ZnSO}_4$ . The preparation process of other control electrolytes was similar to that of electrolytes containing sulfolane except for adding different solvents.

*Materials Characterization:* The ionic conductivity of different electrolytes was measured using a conductivity meter (DDSF-308F). The Zn deposition morphology was acquired by the field-emission scanning electron microscopy (FESEM, Hitachi S-4800). A 3D measuring laser microscope (Olympus LEXT OLS4100) was operated to achieve the laser confocal scanning microscopy (LCSM) images of the Ti foils cycled in Sul/ $\text{ZnSO}_4$  and  $\text{ZnSO}_4$  electrolytes. The surface compositions of Zn anodes were investigated by X-ray photoelectron spectroscopy (XPS, ESCALAB 250Xi) equipped with Al K $\alpha$  X-ray source. The Raman spectra were collected by HORIBA JY LabRAM HR Evolution. The SHIMADZU UV 2550 was adopted to record the concentration change of sulfolane additives during cycling.

*Electrochemical Characterization:* Tafel plots were measured by scanning between  $-0.8$  and  $-1.1$  V at  $1 \text{ mV s}^{-1}$  with Zn plate as the working electrode, Pt foil as the counter electrode, and Ag/AgCl as the reference electrode, respectively. The potentiostatic current-time transient curves were measured at a fixed potential of  $-1.1$  V in  $\text{ZnSO}_4$  electrolyte using three-electrode system. The hydrogen evolution reaction potential was recorded using linear sweep voltammetry method with a scan rate of  $2 \text{ mV s}^{-1}$  in  $0.5\text{M Na}_2\text{SO}_4$  electrolyte. In the alternating current voltammetry tests, the frequency is  $6 \text{ Hz}$  and the amplitude (A) is  $5 \text{ mV}$ , with a potential range extended from  $0.9$  to  $0.1$  V versus  $\text{Zn}^{2+}/\text{Zn}$ . The selective region of phase angles was  $0$  and  $90^\circ$ . Zn symmetric cells (ZBs) were assembled by sandwiching the glass fiber (separators) between commercial Zn plates ( $100 \text{ }\mu\text{m}$ ,  $58.5 \text{ mAh cm}^{-2}$ ) in CR2032-type cell filled with different electrolytes. Zn|Cu half cells were assembled using Zn plate ( $100 \text{ }\mu\text{m}$ ,  $58.5 \text{ mAh cm}^{-2}$ ) as anode, Cu foils ( $20 \text{ }\mu\text{m}$ ) as cathodes, glass fiber as separator. The  $\text{V}_2\text{O}_5$  and  $\text{MnO}_2$  electrodes were prepared by casting slurry onto a carbon cloth (HESEN, HCP330N). The slurry was composed of commercial  $\text{V}_2\text{O}_5$  (Sigma-Aldrich) or  $\text{MnO}_2$  (Saibo materials), conductive carbon (Ketjen Black) and PVDF binder (Kejing, Shenzhen) with mass ratio of 7:2:1. The  $\text{V}_2\text{O}_5$  and  $\text{MnO}_2$  electrode was then dried in an oven under  $80 \text{ }^\circ\text{C}$  for  $12 \text{ h}$ . The mass loading of  $\text{V}_2\text{O}_5$  and  $\text{MnO}_2$  electrodes is  $5.2 \pm 0.2$  and  $8.4 \pm 0.4 \text{ mg cm}^{-2}$ , respectively. Zn metal full cells were assembled using Zn plate ( $10 \text{ }\mu\text{m}$ ,  $5.85 \text{ mAh cm}^{-2}$ ) and glass fiber as the anode and separator, respectively. For Zn- $\text{V}_2\text{O}_5$  cells,  $\text{V}_2\text{O}_5$  electrodes were employed as cathodes, and Sul/ $\text{ZnSO}_4$  and  $\text{ZnSO}_4$  solution as electrolytes. For Zn- $\text{MnO}_2$  cells,  $0.1\text{M MnSO}_4$  were introduced into Sul/ $\text{ZnSO}_4$  and  $\text{ZnSO}_4$  electrolytes for inhibiting the dissolution of  $\text{Mn}^{2+}$ , and  $\text{MnO}_2$  electrodes were employed as cathodes.

*Computational methods:* The adsorption energy calculations were performed using the Vienna ab-initio simulation package (VASP). The projector-augmented wave (PAW) method was used to represent the core-valence interaction.<sup>[S1]</sup> The plane wave energy cutoff was set to  $450 \text{ eV}$ . The generalized gradient approximation (GGA) with the Perdew-Burke-Ernzerhof (PBE)

exchange-correlation functional<sup>[S2]</sup> were used in our calculations. The first Brillion zone k-point sampling utilizes the Monkhorst-Pack scheme with a  $2 \times 2 \times 1$  grid meshes. The energy and force criterion for convergence of the electron density are set at  $10^{-6}$  eV and  $0.05$  eV/Å, respectively. The long-range dispersion (van der Waals interactions) corrections were evaluated using DFT-D3 method.<sup>[S3]</sup> A  $5 \times 5$  supercell with five-layer thickness for Zn (0001) surface is adopted which contains 125 Zn atoms. The bottom two layers are fixed during structure optimization. A vacuum gap of approximately  $12$  Å was used in normal direction to avoid the interaction between slabs. The adsorption energy ( $E_{\text{ads}}$ ) of molecules is calculated according to the following equation:  $E_{\text{ads}} = E_{\text{tot}} - E_{\text{Zn}} - E_{\text{mol}}$ , where  $E_{\text{tot}}$ ,  $E_{\text{Zn}}$  and  $E_{\text{mol}}$  are the total energy of surface with the adsorbed molecules, the energy of Zn surface and the molecule energy, respectively.

The HOMO-LUMO energy level calculations were performed via the Gaussian 16 suite of programs.<sup>[S4]</sup> The structures of the studied compounds were fully optimized at the B3LYP/6-311+G(d,p) level of theory. The vibrational frequencies of the optimized structures were carried out at the same level. The structures were characterized as a local energy minimum on the potential energy surface by verifying that all the vibrational frequencies were real. The energy of the HOMOs and LUMOs as well as their gaps were calculated. The Visual Molecular Dynamics (VMD) program<sup>[S5]</sup> was used to plot the color-filled isosurfaces graphs to visualize the molecular orbitals.

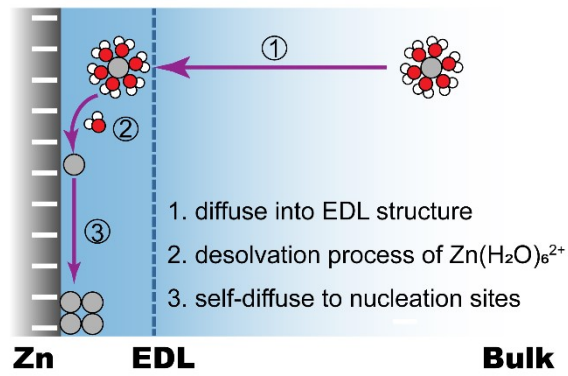

**Fig. S1.** Schematic of the Zn deposition process in the EDL structure.

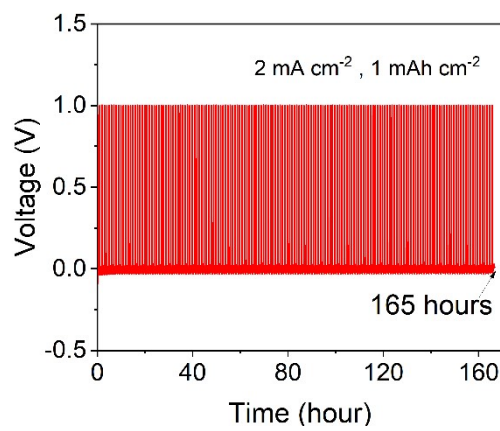

**Fig. S2.** Voltage profiles of Zn|Cu half cells using bare ZnSO<sub>4</sub> electrolytes.

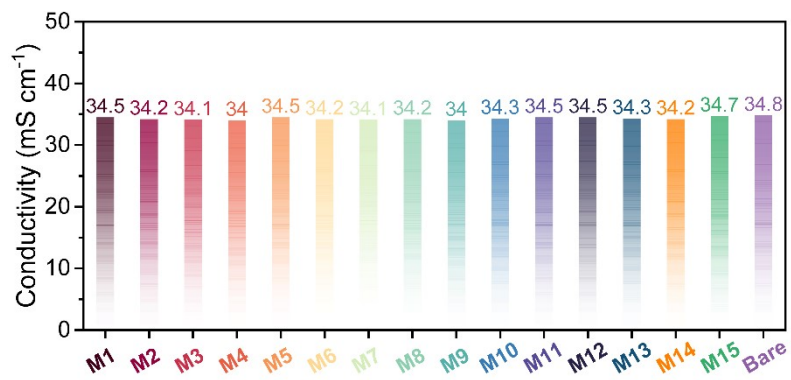

**Fig. S3.** Ion conductivity of selected representative electrolytes.

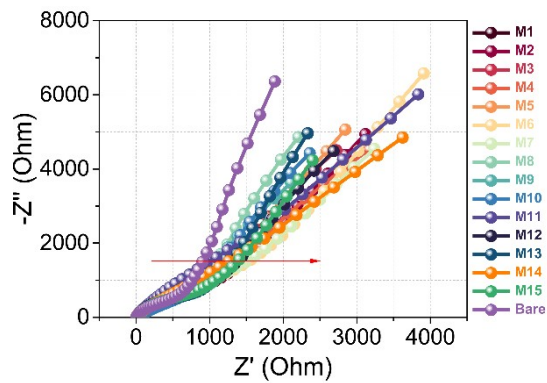

**Fig. S4.** EIS spectra of Zn|Cu half cells using selected representative electrolytes.

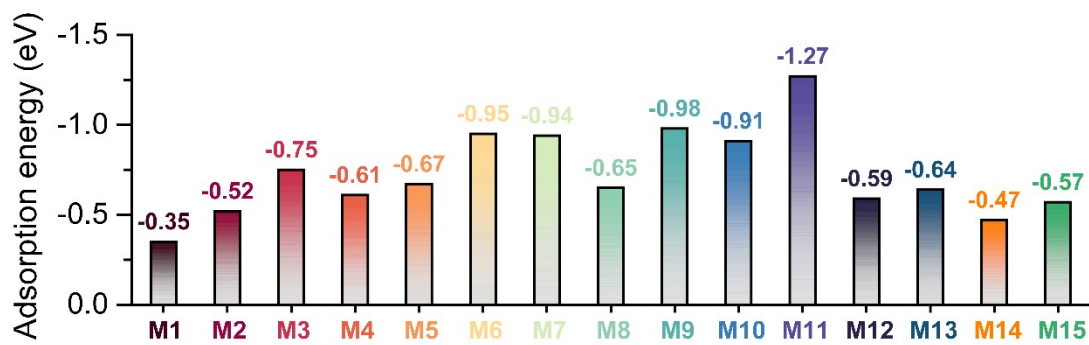

**Fig. S5.** Adsorption energy of solvent additives on the Zn (0001) surface.

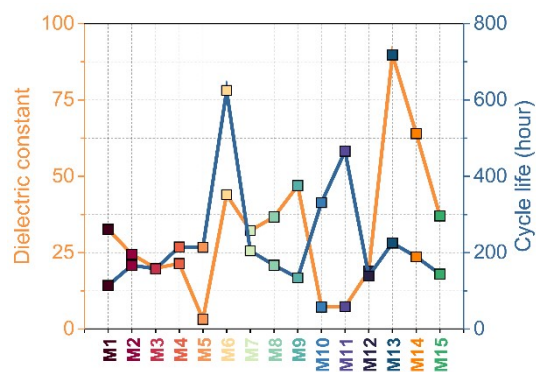

**Fig. S6.** Correlation between the cycle life of Zn|Cu half cells and dielectric constant of solvent additives.

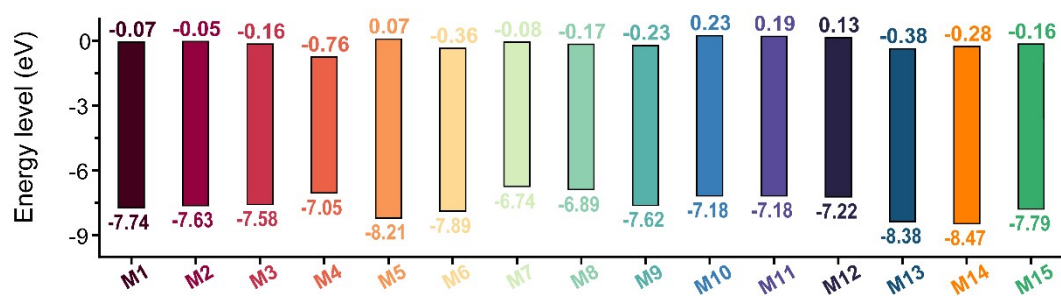

**Fig. S7.** HOMO-LUMO energy level of solvent additives.

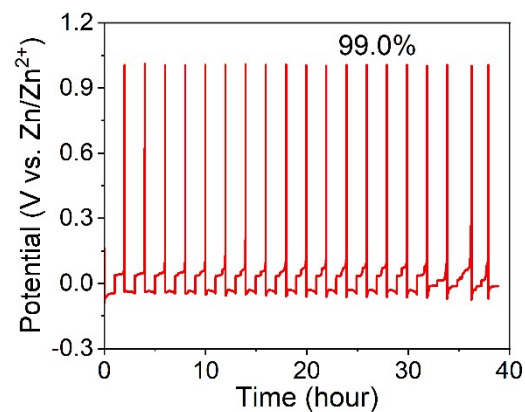

**Fig. S8.** Voltage profiles of Zn|Cu half cells using bare ZnSO<sub>4</sub> electrolytes at a current density of 10 mA cm<sup>-2</sup> and a capacity of 10 mAh cm<sup>-2</sup>.

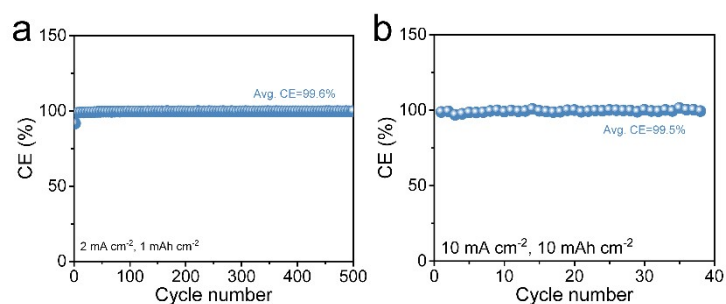

**Fig. S9.** CE of Zn|Cu half cells using 1 vol% DMSO at a current density of a) 2 mA cm<sup>-2</sup> and b) 10 mA cm<sup>-2</sup>.

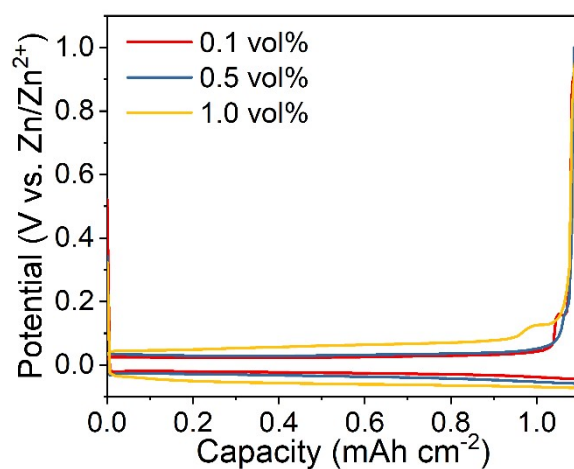

**Fig. S10.** Voltage profiles of Zn|Cu half cells using different concentration of sulfolane.



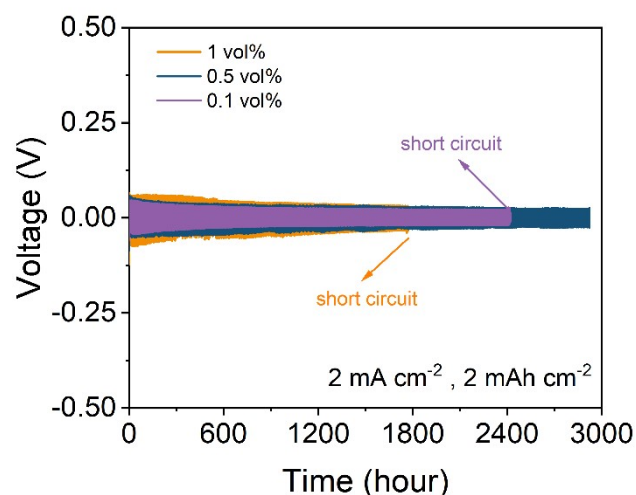

**Fig. S11.** Voltage profiles of Zn|Zn symmetric cells using different concentration of sulfolane.

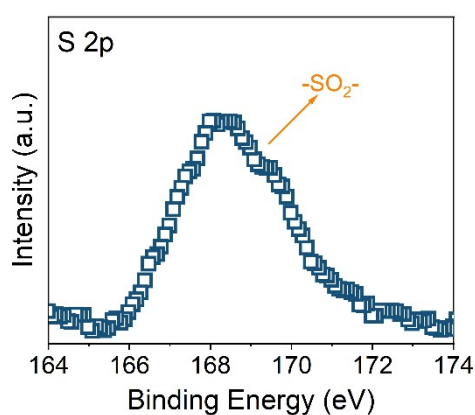

**Fig. S12** The S 2p spectra of the Zn anode immersed in deionized water with 0.5 vol% sulfolane.

**Table S1.** The corrosion current density of Zn anodes in Sul/ZnSO<sub>4</sub> and ZnSO<sub>4</sub> electrolyte.

| Electrolytes          | Corrosion potential | Corrosion current density |
|-----------------------|---------------------|---------------------------|
| ZnSO <sub>4</sub>     | -0.973 V            | 0.74 mA cm <sup>-2</sup>  |
| Sul/ZnSO <sub>4</sub> | -0.97 V             | 0.12 mA cm <sup>-2</sup>  |

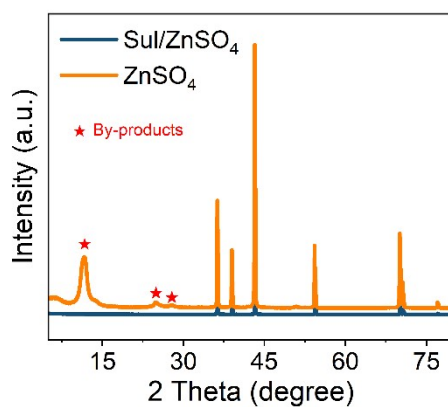

**Fig. S13** The XRD pattern of Zn anodes immersed in Sul/ZnSO<sub>4</sub> and ZnSO<sub>4</sub> electrolytes.

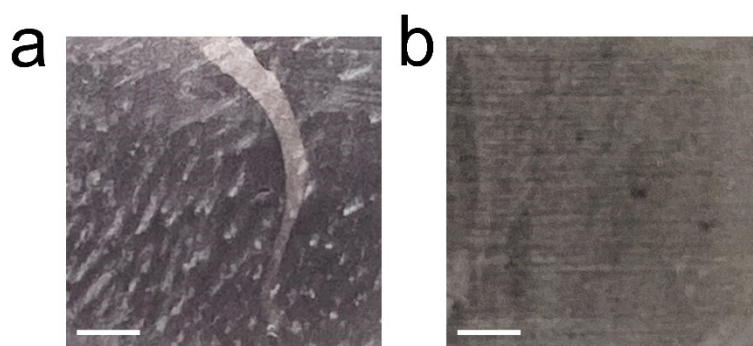

**Fig. S14.** Optical photos of Cu foils after tested at a current density of 2 mA cm<sup>-2</sup> for 100 s in a) ZnSO<sub>4</sub> and b) Sul/ZnSO<sub>4</sub> electrolytes (Scale bar: 200 mm).

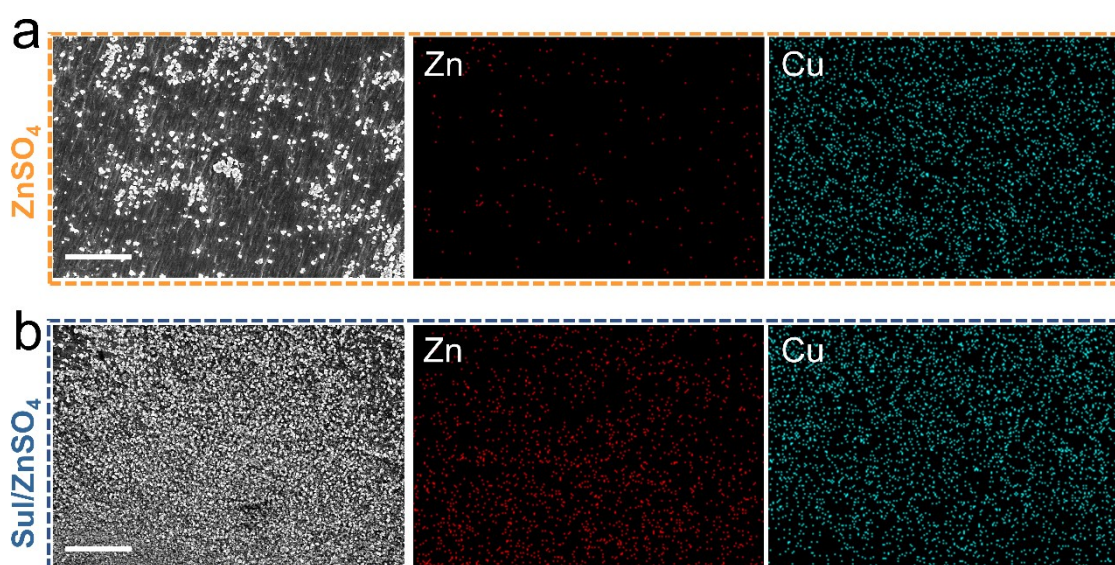

**Fig. S15.** SEM images and EDS mapping of Cu foils after tested at a current density of 2 mA cm<sup>-2</sup> for 100 s in a) ZnSO<sub>4</sub> and b) Sul/ZnSO<sub>4</sub> electrolytes (Scale bar: 25 μm).

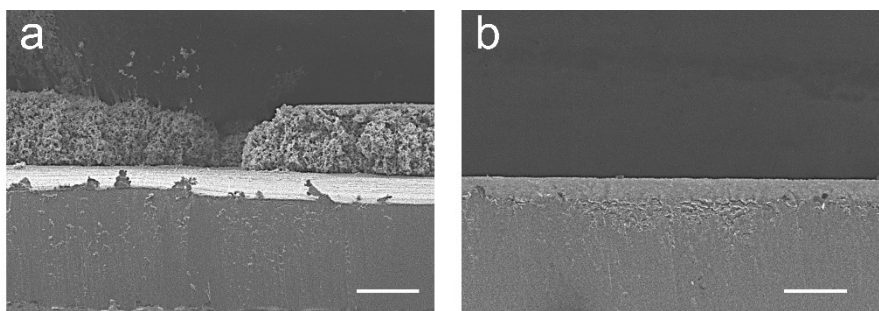

**Fig. S16** Cross-sectional SEM images of Cu cathodes tested in a)  $\text{ZnSO}_4$  electrolytes and b) Sul/  $\text{ZnSO}_4$  electrolytes (Scale bar:  $50\ \mu\text{m}$ ).

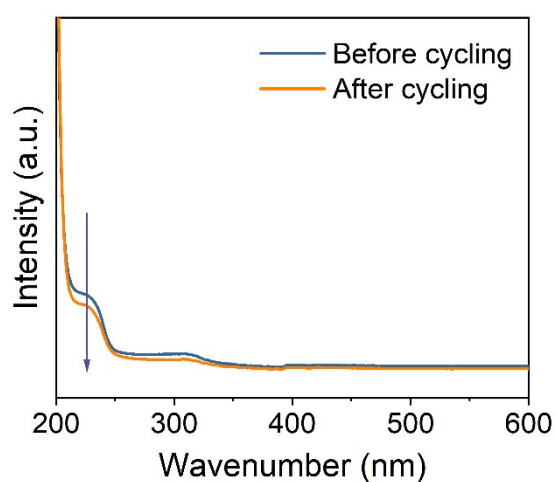

**Fig. S17.** UV-vis spectra of Sul/ $\text{ZnSO}_4$  electrolytes before and after cycling.

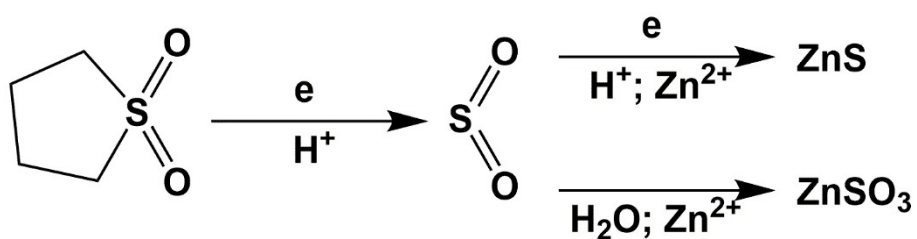

**Fig. S18.** The possible decomposition pathway of sulfolane during cycling.

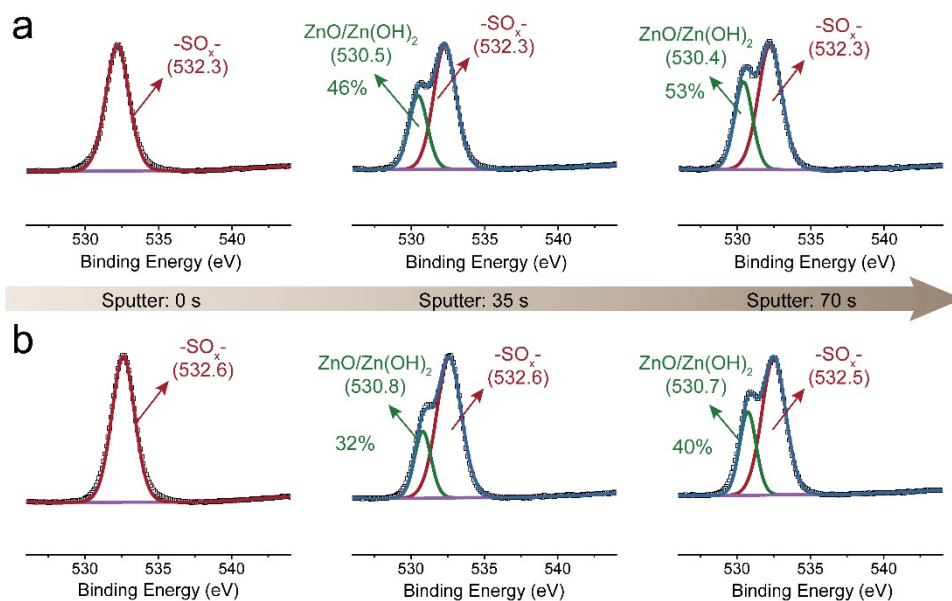

**Fig. S19.** XPS depth profiles of O 1s spectra of Zn anodes cycled in a) Sul/ZnSO<sub>4</sub> electrolytes and b) ZnSO<sub>4</sub> electrolytes (x=2, 3, or 4).

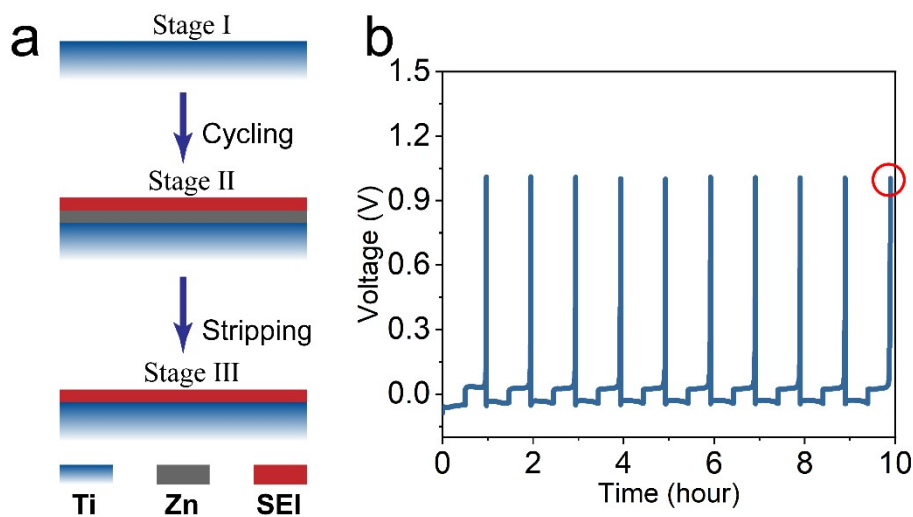

**Fig. S20.** a) Schematic of SEI formation process on the Ti foil. b) Voltage profiles of Zn|Ti half cells at 2 mA cm<sup>-2</sup> with a capacity of 1 mAh cm<sup>-2</sup>.

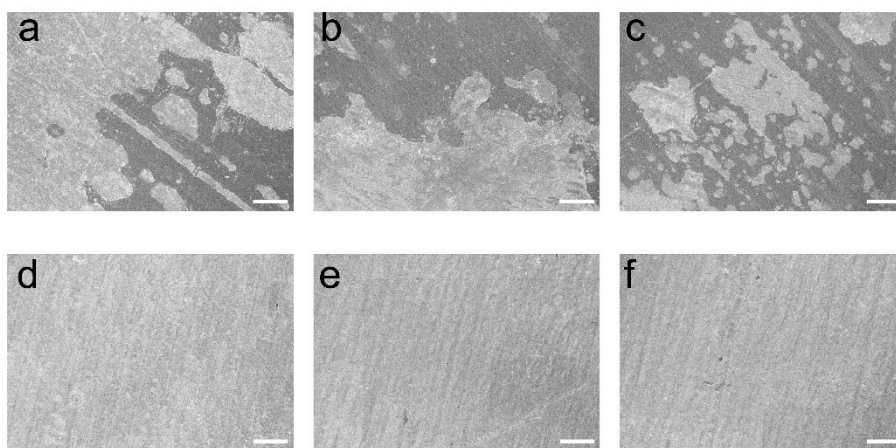

**Fig. S21.** SEM images of the SEI layer formed in a-c)  $\text{ZnSO}_4$  and d-f)  $\text{Sul}/\text{ZnSO}_4$  electrolytes (Scale bar:  $50\ \mu\text{m}$ ).

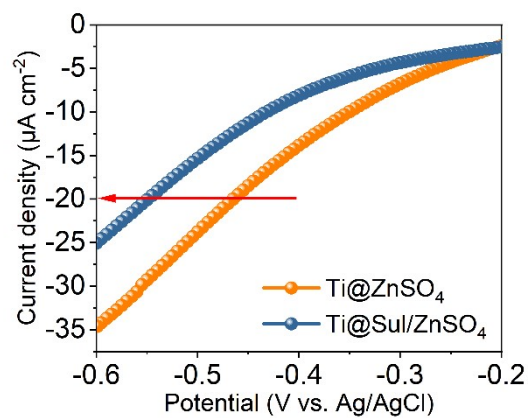

**Fig. S22.** LSV curves of  $\text{Ti@Sul}/\text{ZnSO}_4$  and  $\text{Ti@}/\text{ZnSO}_4$  in  $0.5\text{M Na}_2\text{SO}_4$  electrolytes at a scan rate of  $2\ \text{mV s}^{-1}$ .

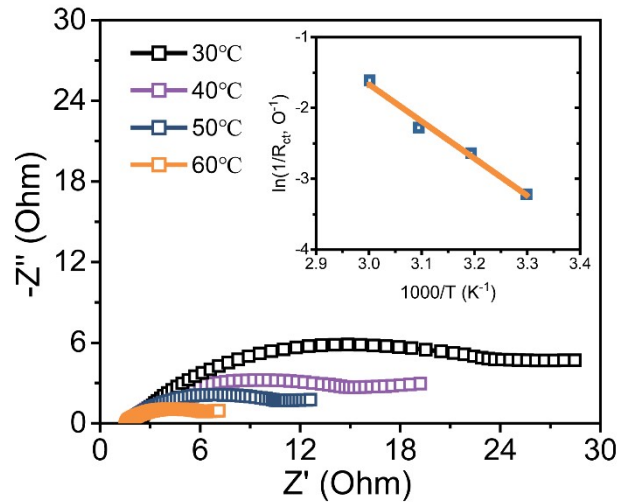

**Fig. S23.** EIS spectra of Zn|Zn symmetric cells in Sul/ZnSO<sub>4</sub> electrolytes under different temperature.

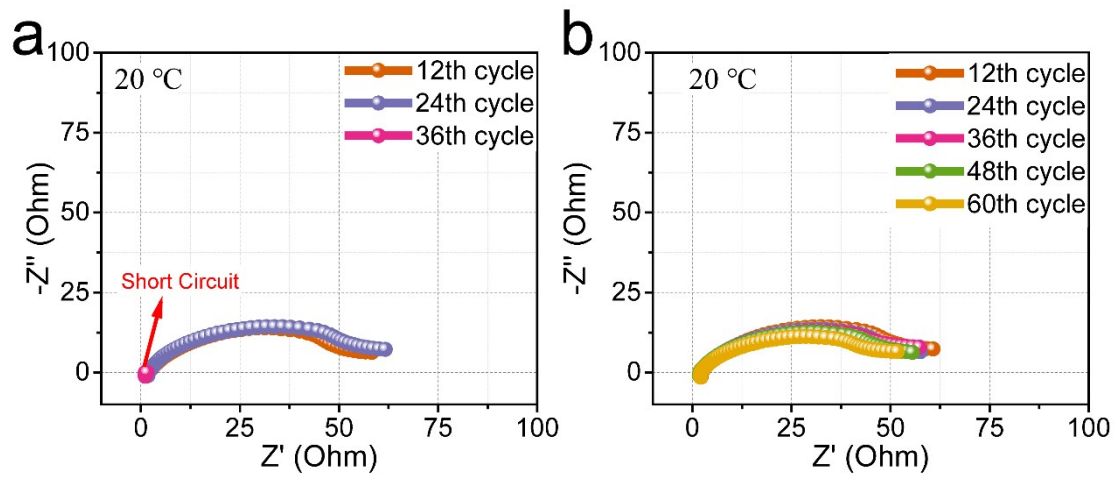

**Fig. S24.** EIS spectra of Zn|Zn symmetric cells in a) ZnSO<sub>4</sub> and b) Sul/ZnSO<sub>4</sub> electrolytes at different cycles.

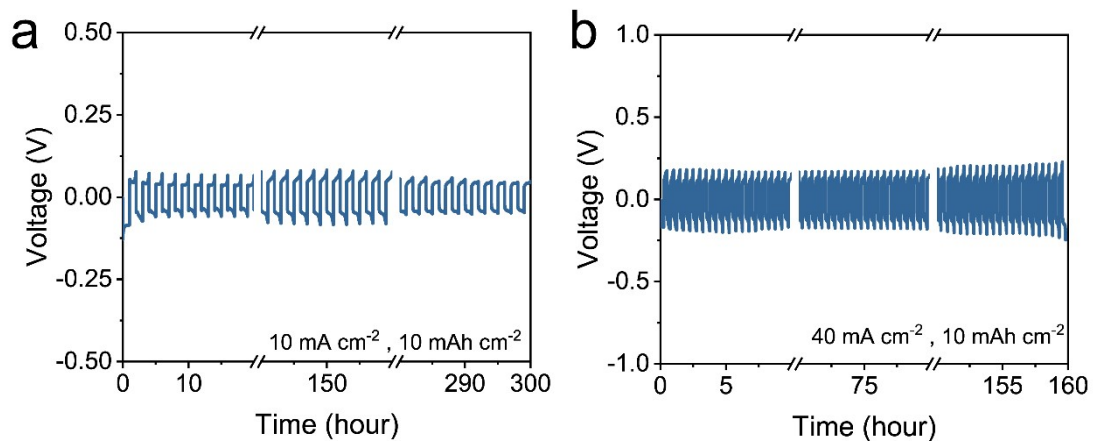

**Fig. S25.** Enlarged voltage profiles of Zn|Zn symmetric cells in Sul/ZnSO<sub>4</sub> electrolytes at a) 10 mA cm<sup>-2</sup> with 10 mAh cm<sup>-2</sup> and b) 40 mA cm<sup>-2</sup> with 10 mAh cm<sup>-2</sup>.

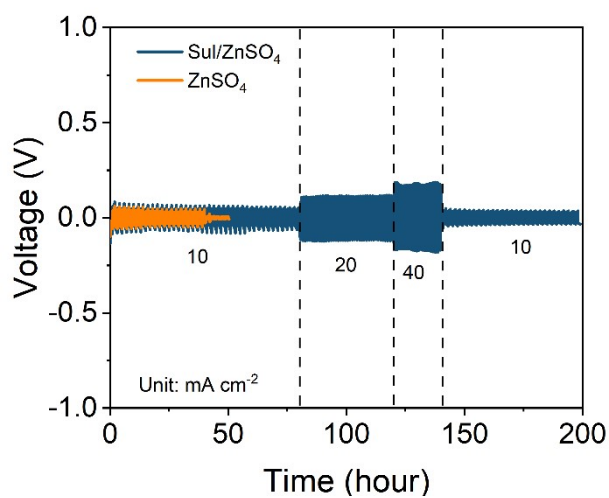

**Fig. S26.** Rate performance of Zn|Zn symmetric cells in Sul/ZnSO<sub>4</sub> electrolytes.

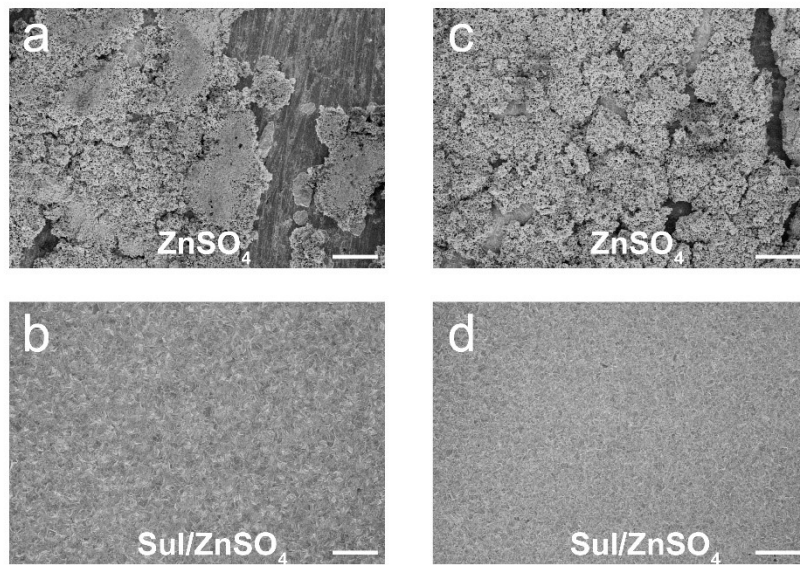

**Fig. S27.** SEM images of Zn anodes cycled at a-b)  $10 \text{ mA cm}^{-2}$  with  $10 \text{ mAh cm}^{-2}$  and c-d)  $40 \text{ mA cm}^{-2}$  with  $10 \text{ mAh cm}^{-2}$  (Scale bar:  $50 \text{ }\mu\text{m}$ ).



**Table S2.** The performance comparison of Zn|Cu half cells in SA/ZnSO<sub>4</sub> electrolytes with other reported works.

| Solvent                       | Capacity<br>(mAh cm <sup>-2</sup> ) | Current<br>density<br>(mA cm <sup>-2</sup> ) | CPC<br>(mAh cm <sup>-2</sup> ) | Volume<br>Ratio | Ref.                 |
|-------------------------------|-------------------------------------|----------------------------------------------|--------------------------------|-----------------|----------------------|
| <b>Sulfolane</b>              | <b>10</b>                           | <b>40</b>                                    | <b>3200</b>                    | <b>0.5%</b>     | <b>This<br/>work</b> |
| Ethylene glycol               | 1                                   | 2                                            | 145                            | 40%             | [S6]                 |
| Dimethyl<br>sulfoxide         | 0.5                                 | 0.5                                          | 250                            | 18.9%           | [S7]                 |
| Propylene<br>carbonate        | 0.5                                 | 10                                           | 1000                           | 50%             | [S8]                 |
| N-methyl-2-<br>pyrrolidone    | 5                                   | 5                                            | 488                            | 5%              | [S9]                 |
| N, N-dimethyl<br>acetamide    | 3                                   | 3                                            | 1500                           | 10%             | [S10]                |
| 1,2-<br>dimethoxyethane       | 2.5                                 | 5                                            | 2750                           | 40%             | [S11]                |
| Diethyl ether                 | 0.2                                 | 0.2                                          | 50                             | 2%              | [S12]                |
| N,N-<br>dimethylformami<br>de | 0.5                                 | 0.5                                          | 500                            | 30%             | [S13]                |
| 1,3-dioxolane                 | 1                                   | 1                                            | 490                            | 50%             | [S14]                |
| Glycerol                      | 2                                   | 6                                            | 900                            | 50%             | [S15]                |
| 1,2-<br>dimethoxyethane       | 2                                   | 2                                            | 380                            | 1%              | [S16]                |
| ethylene glycol               | 0.5                                 | 5                                            | 2000                           | 68%             | [S17]                |
| N-methyl-2-<br>pyrrolidone    | 10                                  | 5                                            | 500                            | 5%              | [S18]                |

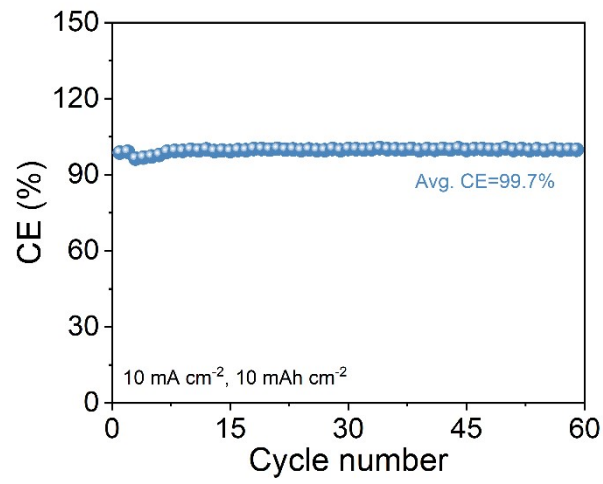

**Fig. S28.** CE evolution of Zn|Cu half cells using aged Sul/ZnSO<sub>4</sub> electrolytes.

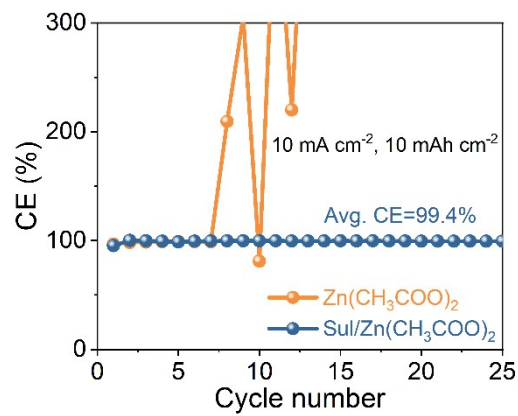

**Fig. S29.** CE evolution of Zn|Cu half cells using Sul/Zn(CH<sub>3</sub>COO)<sub>2</sub> and Zn(CH<sub>3</sub>COO)<sub>2</sub> electrolytes

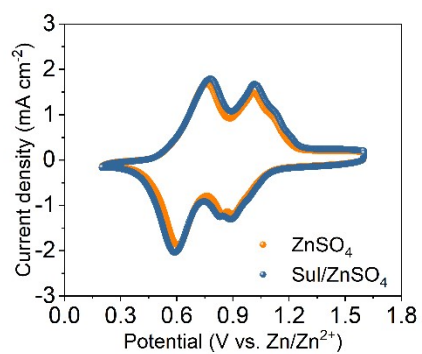

**Fig. S30.** CV curves of Zn-V<sub>2</sub>O<sub>5</sub> full cells in Sul/ZnSO<sub>4</sub> and ZnSO<sub>4</sub> electrolytes at a scan rate of 0.3 mV s<sup>-1</sup>.

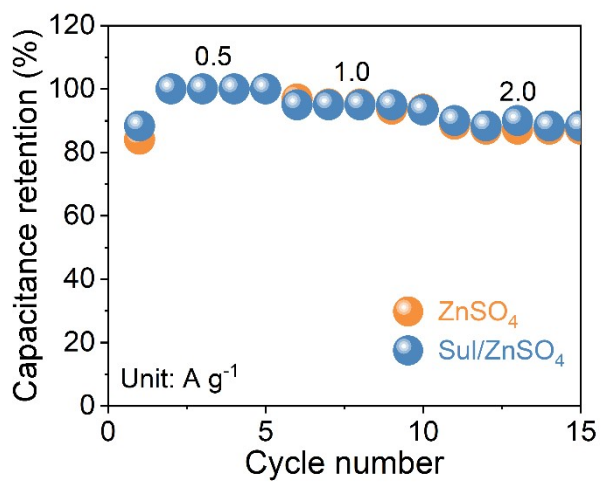

**Fig. S31.** Rate performance of Zn-V<sub>2</sub>O<sub>5</sub> full cells in Sul/ZnSO<sub>4</sub> and ZnSO<sub>4</sub> electrolytes.

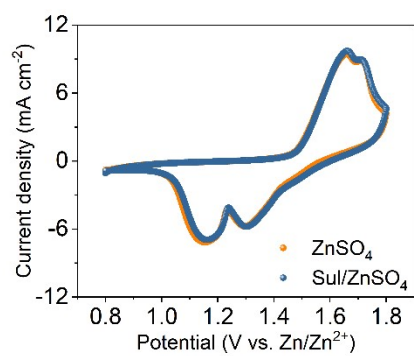

**Fig. S32.** CV curves of Zn-MnO<sub>2</sub> full cells in Sul/ZnSO<sub>4</sub> and ZnSO<sub>4</sub> electrolytes at a scan rate of 0.5 mV s<sup>-1</sup>

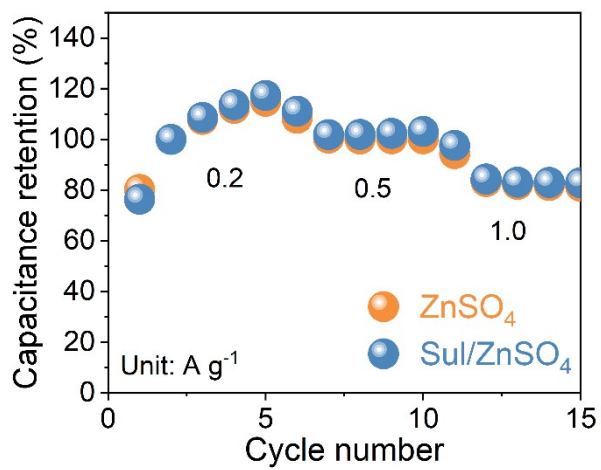

**Fig. S33.** Rate performance of Zn-MnO<sub>2</sub> full cells in Sul/ZnSO<sub>4</sub> and ZnSO<sub>4</sub> electrolytes.

## Reference

- [S1] a) P. E. Blöchl, Phys. Rev. B: Condens. Matter Mater. Phys. **1994**, 50, 17953; b) G. Kresse, D. Joubert, Phys. Rev. B: Condens. Matter Mater. Phys. **1999**, 59, 1758.
- [S2] J. P. Perdew, K. Burke, M. Ernzerhof, Phys. Rev. Lett. **1996**, 77, 3865.
- [S3] S. Grimme, J. Antony, S. Ehrlich, H. Krieg, J. Chem. Phys. **2010**, 132, 154104.
- [S4] M. J. Frisch, G. W. Trucks, H. B. Schlegel, et al., Gaussian 16 Revision. A.03, Gaussian Inc., Wallingford, CT, 2016.
- [S5] W. Humphrey, A. Dalke and K. Schulten, J Mol Graph Model, **1996**, 14, 33-38.
- [S6] N. N. Chang, T. Y. Li, R. Li, S. N. Wang, Y. B. Yin, H. M. Zhang, X. F. Li, Energy & Environmental Science **2020**, 13, 3527.
- [S7] L. Cao, D. Li, E. Hu, J. Xu, T. Deng, L. Ma, Y. Wang, X. Q. Yang, C. Wang, J Am Chem Soc **2020**, 142, 21404.
- [S8] F. Ming, Y. Zhu, G. Huang, A. H. Emwas, H. Liang, Y. Cui, H. N. Alshareef, J Am Chem Soc **2022**, 144, 7160.
- [S9] T. C. Li, Y. Lim, X. L. Li, S. Z. Luo, C. J. Lin, D. L. Fang, S. W. Xia, Y. Wang, H. Y. Yang, Advanced Energy Materials **2022**, 12, 2103231.
- [S10] W. Deng, Z. Xu, X. Wang, Energy Storage Materials **2022**, 52, 52.
- [S11] G. Ma, L. Miao, Y. Dong, W. Yuan, X. Nie, S. Di, Y. Wang, L. Wang, N. Zhang, Energy Storage Materials **2022**, 47, 203.
- [S12] W. N. Xu, K. N. Zhao, W. C. Huo, Y. Z. Wang, G. Yao, X. Gu, H. W. Cheng, L. Q. Mai, C. G. Hu, X. D. Wang, Nano Energy **2019**, 62, 275.
- [S13] Y. Ma, Q. Zhang, L. Liu, Y. Li, H. Li, Z. Yan, J. Chen, Natl Sci Rev **2022**, 9, nwac051.
- [S14] H. Du, K. Wang, T. Sun, J. Shi, X. Zhou, W. Cai, Z. Tao, Chemical Engineering Journal **2022**, 427.
- [S15] Y. Zhang, M. Zhu, K. Wu, F. Yu, G. Wang, G. Xu, M. Wu, H.-K. Liu, S.-X. Dou, C. Wu, Journal of Materials Chemistry A **2021**, 9, 4253.
- [S16] J. Cui, X. Liu, Y. Xie, K. Wu, Y. Wang, Y. Liu, J. Zhang, J. Yi, Y. Xia, Materials Today Energy **2020**, 18.
- [S17] R. Z. Qin, Y. T. Wang, M. Z. Zhang, Y. Wang, S. X. Ding, A. Y. Song, H. C. Yi, L. Y. Yang, Y. L. Song, Y. H. Cui, J. Liu, Z. Q. Wang, S. N. Li, Q. H. Zhao, F. Pan, Nano Energy **2021**, 80, 105478.
- [S18] D. Wang, D. Lv, H. Liu, S. Zhang, C. Wang, C. Wang, J. Yang, Y. Qian, Angew Chem Int Ed Engl **2022**, e202212839.
